# Supplementary material for: Tuning the spin crossover behavior of the polyanion [(H2O)6Fe3(μ-L)6]6–: the case of the cesium salt
Source: Royal Society of Chemistry journal article supplement (doi:10.1039/c8dt01339j), 2018-01-01
Supplement: c8dt01339j1.pdf [file c8dt01339j1.pdf]

**Tuning the spin crossover behavior of the polyanion [(H<sub>2</sub>O)<sub>6</sub>Fe<sub>3</sub>(μ-L)<sub>6</sub>]<sup>6-</sup>: The case of the cesium salt (L<sup>2-</sup> = (1,2,4-triazol-4-yl)ethanesulfonate)**

Andrea Moneo-Corcuera, David Nieto-Castro, Cristina Sáenz de Pipaón, Verónica Gómez, Pilar Maldonado-Illescas, Jose Ramon Galan-Mascaros

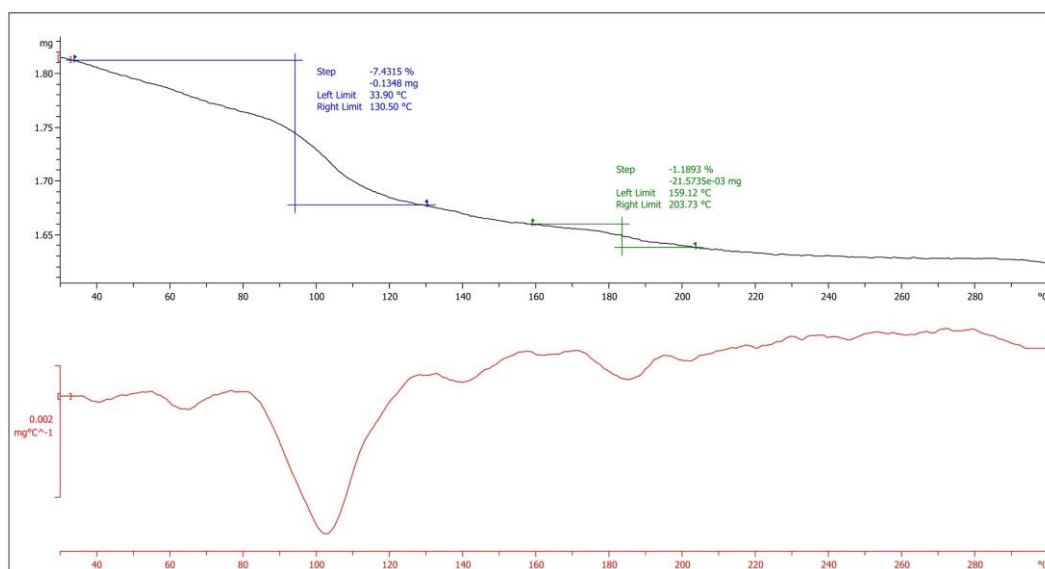

**Figure S1.** TGA data in the range from 20°C to 300°C (scan rate of 1°C min<sup>-1</sup>) for compound 2.

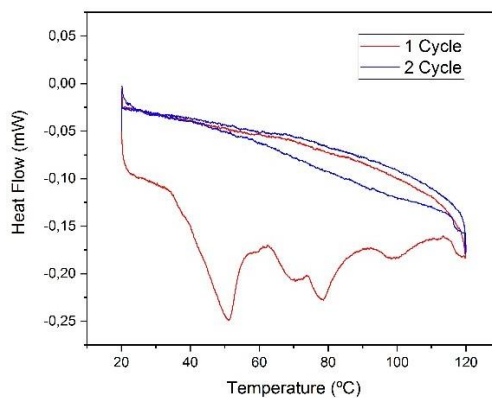

**Figure S2.** DSC cycles in the range from 20°C to 120°C (scan rate of 1°C min<sup>-1</sup>) for compound 2.

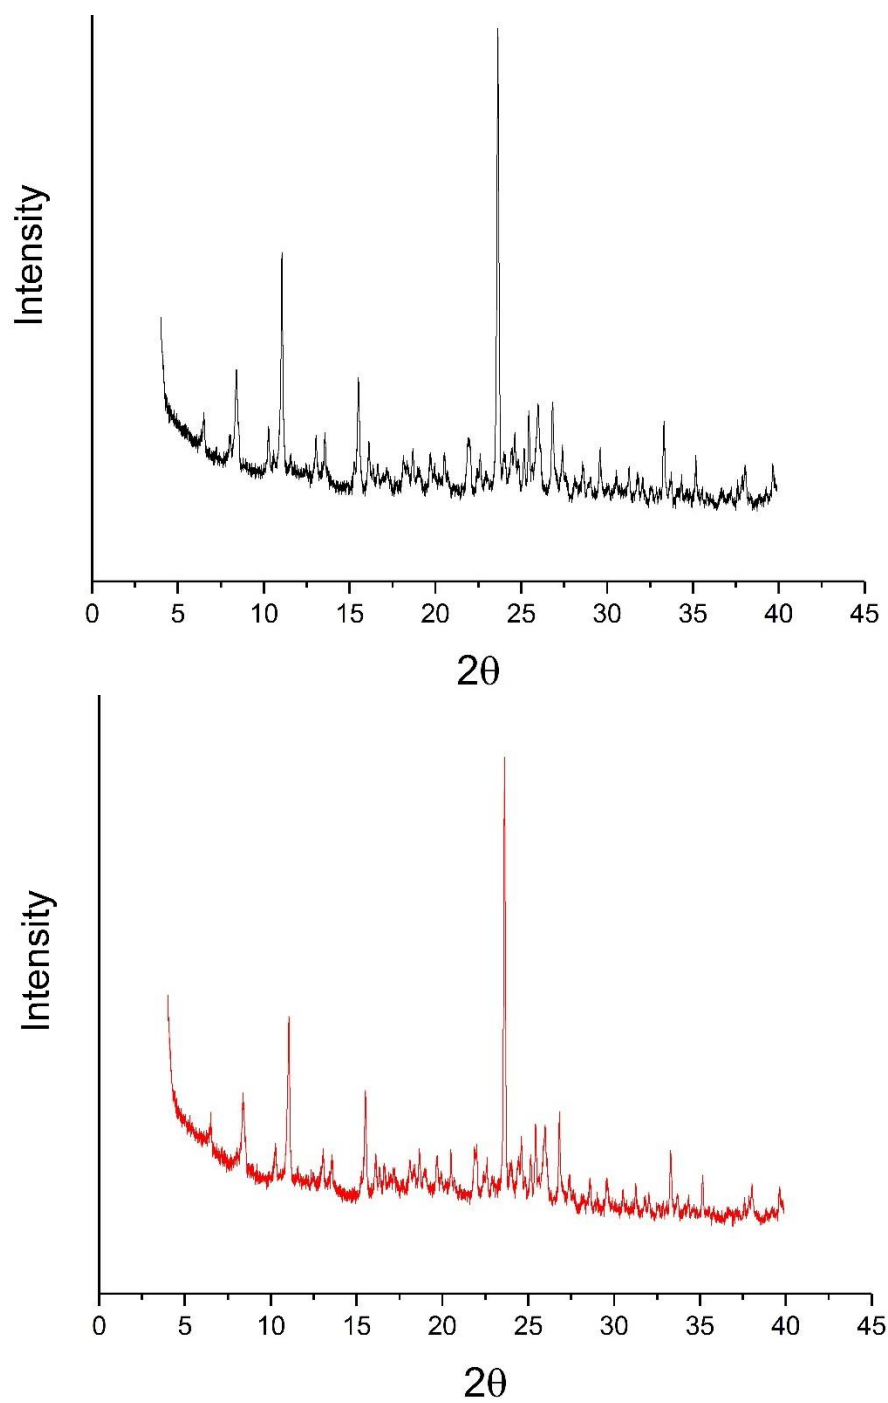

**Figure S3.** XRD powder pattern for a polycrystalline sample of compound 2, obtained by graining of single crystals. (Top) as prepared; (bottom) after four thermal hysteresis cycles in the 200-400 K range inside the Quantum Design SQUID Magnetometer.
